# Supplementary material for: Trends of Eurasian Perch (Perca fluviatilis) mtDNA ATP6 Region Genetic Diversity within the Hydro-Systems of the Eastern Part of the Baltic Sea in the Anthropocene
Source: MDPI journal article supplement (doi:10.3390/ani13193057), 2023-09-29
Supplement: s1 [file s1]

Supplementary Material

**Table S1.** Different haplotypes detected in studied perch samples.

| Code                      | Location                               | Basin                          | Haplotypes                                          |
|---------------------------|----------------------------------------|--------------------------------|-----------------------------------------------------|
| <b>Latvian Samples</b>    |                                        |                                |                                                     |
| 1                         | Lake Engure                            | Baltic Sea                     | A (8), C (2), D (8), D2 (1)                         |
| 2                         | Lake Cirišu                            | Daugava River                  | A (14), A2 (1), B (1), B1 (1), C (2), C1 (1), D (1) |
| <b>Lithuanian Samples</b> |                                        |                                |                                                     |
| 3                         | Lake Drūkšiai                          | Daugava River                  | A (13), B (2), C (6), C2 (1)                        |
| 4                         | Lake Žeimenys                          | Žeimena River                  | A (13), C (4)                                       |
| 5                         | Siesartis River                        | Siesartis River-Šventoji River | A (5), A1 (1), A3 (1), C (3), D (1)                 |
| 6                         | Dotnuvėlė River (Akademijos Reservoir) | Dotnuvėlė River                | A (3), C (3), D (7), D3 (1)                         |
| 7                         | Curonian Lagoon                        | Baltic Sea                     | A (2), D (4)                                        |
| 8                         | Elektrėnai Reservoir                   | Strėva River                   | A (5), D (2), D3 (1)                                |
| 9a                        | Neris River (Baltalaukis)              | Neris River                    | A (5), B (2), C (2), D (3)                          |
| 9b                        | Neris River (Buivydžiai)               | Neris River                    | A (10), C (6), D (2)                                |
| <b>Belarusian Samples</b> |                                        |                                |                                                     |
| 10a                       | Meleshkovichi River channel            | Pripyat River                  | B (10)                                              |
| 10b                       | Mozyr                                  | Pripyat River                  | A (4), B (8), C (11)                                |
| 10c                       | Lake Aleksino                          | Pripyat River                  | B (1), C (1)                                        |
| 10d                       | Berezina River                         | Berezina River-Dnieper River   | A (1), C (1)                                        |
| <b>Ukrainian Samples</b>  |                                        |                                |                                                     |
| 11a                       | Ukraine (Chernobyl area)               | Pripyat River-Dnieper River    | C (1)                                               |
| 11b                       | Ukraine                                | Desna River                    | A (1), B (3), C (2), D1 (1)                         |

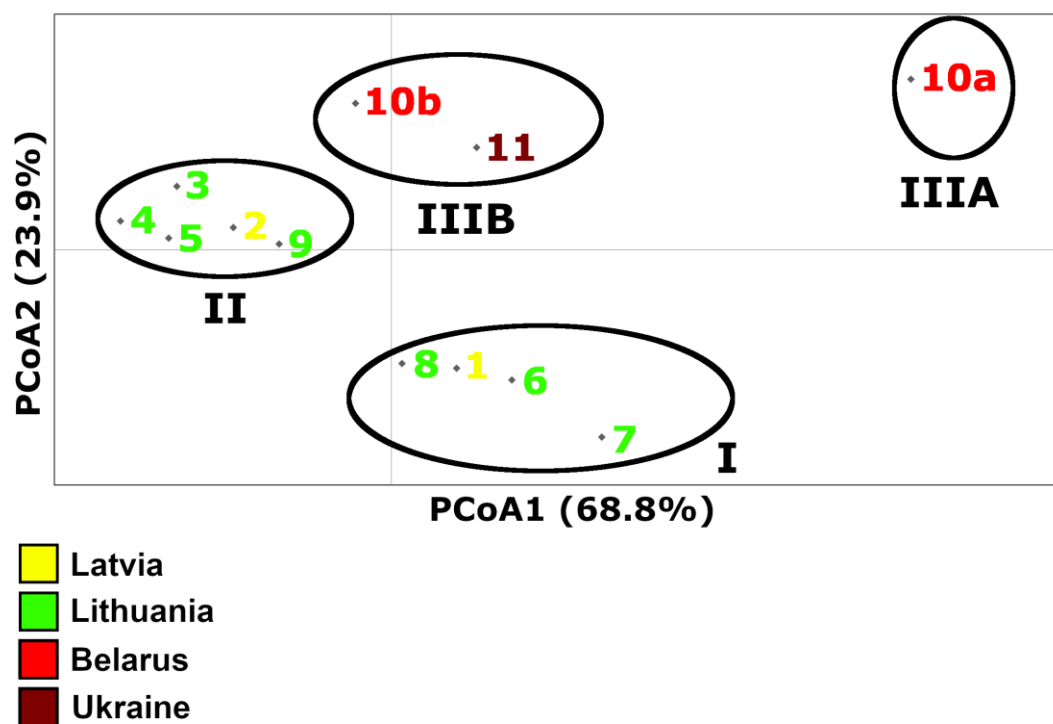

**Figure S1.** Principal coordinates analysis (PCoA) of Latvian, Lithuanian, Belarusian (comprised of only 10a and 10b samples), and Ukrainian perch samples. There are three genetic groups: I, II, and III. Codes: 1 – Lake Engure; 2 – Lake Cīrīšu; 3 – Lake Drūkšiai; 4 – Lake Žeimenys; 5 – Siesartis River; 6 – Dotnuvėlė River; 7 – the Curonian Lagoon; 8 – Elektrėnai Reservoir; 9 – the Neris River; 10a – Meleshkovichi River channel; 10b – Mozyr; 11 – Ukraine.

**Supplementary Table S2.** Comparison of haplotypes and corresponding haplogroups at different mtDNA *ATP6* and D-loop regions using data of the same individuals from Cirišu, Engure and Drūkšiai lakes [35], Chernobyl, Elektrėnai Reservoir and GenBank.

| No                     | Individual Code | mtDNA Marker       |            |                 |            | Composite <i>ATP6</i> -D-loop haplotypes |
|------------------------|-----------------|--------------------|------------|-----------------|------------|------------------------------------------|
|                        |                 | <i>ATP6</i> region |            | D-loop region   |            |                                          |
|                        |                 | Haplotype          | Haplogroup | Haplotype       | Haplogroup |                                          |
| Lake Cirišu (n = 21)   |                 |                    |            |                 |            |                                          |
| 1                      | C6              | A                  | A          | B4 <sup>a</sup> | B          | A-B4                                     |
| 2                      | C7              | A                  | A          | B               | B          | A-B                                      |
| 3                      | C8              | B                  | B          | J               | J          | B-J                                      |
| 4                      | C10             | D                  | D          | F7              | F          | D-F7                                     |
| 5                      | C11             | A                  | A          | B               | B          | A-B                                      |
| 6                      | C15             | A                  | A          | B               | B          | A-B                                      |
| 7                      | C17             | A                  | A          | B               | B          | A-B                                      |
| 8                      | C20             | A                  | A          | B               | B          | A-B                                      |
| 9                      | C22             | A                  | A          | B               | B          | A-B                                      |
| 10                     | C23             | A                  | A          | B               | B          | A-B                                      |
| 11                     | C25             | C                  | C          | C               | C          | C-C                                      |
| 12                     | C26             | A                  | A          | B               | B          | A-B                                      |
| 13                     | C28             | A                  | A          | B               | B          | A-B                                      |
| 14                     | C30             | B1                 | B          | J               | J          | B1-J                                     |
| 15                     | C33             | C1                 | C          | C               | C          | C1-C                                     |
| 16                     | C34             | A                  | A          | B               | B          | A-B                                      |
| 17                     | C35             | A                  | A          | B               | B          | A-B                                      |
| 18                     | C37             | A2                 | A          | B               | B          | A2-B                                     |
| 19                     | C38             | C                  | C          | C               | C          | C-C                                      |
| 20                     | C39             | A                  | A          | B               | B          | A-B                                      |
| 21                     | C41             | A                  | A          | B               | B          | A-B                                      |
| Lake Engure (n = 19)   |                 |                    |            |                 |            |                                          |
| 22                     | ENG19           | D                  | D          | B               | B          | D-B                                      |
| 23                     | ENG20           | C                  | C          | B               | B          | C-B                                      |
| 24                     | ENG21           | A                  | A          | B               | B          | A-B                                      |
| 25                     | ENG22           | A                  | A          | B               | B          | A-B                                      |
| 26                     | ENG24           | A                  | A          | B               | B          | A-B                                      |
| 27                     | ENG26           | D                  | D          | B               | B          | D-B                                      |
| 28                     | ENG28           | D                  | D          | F               | F          | D-F                                      |
| 29                     | ENG32           | D                  | D          | B               | B          | D-B                                      |
| 30                     | ENG34           | C                  | C          | F               | F          | C-F                                      |
| 31                     | ENG36           | A                  | A          | B               | B          | A-B                                      |
| 32                     | ENG39           | D                  | D          | C7              | C          | D-C7                                     |
| 33                     | ENG41           | D                  | D          | F               | F          | D-F                                      |
| 34                     | ENG42           | A                  | A          | B               | B          | A-B                                      |
| 35                     | ENG43           | A                  | A          | B               | B          | A-B                                      |
| 36                     | ENG45           | A                  | A          | L9              | -          | A-L9                                     |
| 37                     | ENG46           | D2                 | D          | F4              | F          | D2-F4                                    |
| 38                     | ENG47           | A                  | A          | A               | A          | A-A                                      |
| 39                     | ENG48           | D                  | D          | F               | F          | D-F                                      |
| 40                     | ENG49           | D                  | D          | C8              | C          | D-C8                                     |
| Lake Drūkšiai (n = 22) |                 |                    |            |                 |            |                                          |

|                                     |                       |                   |   |                |   |                  |
|-------------------------------------|-----------------------|-------------------|---|----------------|---|------------------|
| 41                                  | D. E. 1               | B                 | B | C              | C | B-C              |
| 42                                  | D. E. 2               | A                 | A | B              | B | A-B              |
| 43                                  | D. E. 3               | A                 | A | A              | A | A-A              |
| 44                                  | D. E. 4               | C                 | C | C              | C | C-C              |
| 45                                  | D. E. 5               | C                 | C | C              | C | C-C              |
| 46                                  | D. E. 6               | C2                | C | C              | C | C2-C             |
| 47                                  | D. E. 7               | C                 | C | C              | C | C-C              |
| 48                                  | D. E. 8               | C                 | C | C              | C | C-C              |
| 49                                  | D. E. 9               | B                 | B | J              | J | B-J              |
| 50                                  | D.E. 10               | A                 | A | B              | B | A-B              |
| 51                                  | D. E. 11              | A                 | A | A              | A | A-A              |
| 52                                  | D. E. 12              | C                 | C | C              | C | C-C              |
| 53                                  | D. E. 13              | A                 | A | B              | B | A-B              |
| 54                                  | D. E. 14              | A                 | A | A              | A | A-A              |
| 55                                  | D. E. 15              | A                 | A | B              | B | A-B              |
| 56                                  | D. E. 16              | A                 | A | A              | A | A-A              |
| 57                                  | D. E. 17              | C                 | C | C              | C | C-C              |
| 58                                  | D. E. 19              | A                 | A | B              | B | A-B              |
| 59                                  | D. E. 20              | A                 | A | B              | B | A-B              |
| 60                                  | D. E. 21              | A                 | A | B              | B | A-B              |
| 61                                  | D. E. 22              | A                 | A | B              | B | A-B              |
| 62                                  | D. E. 26              | A                 | A | A              | A | A-A              |
| <b>Chernobyl area (n = 1)</b>       |                       |                   |   |                |   |                  |
| 63                                  | UK1                   | C                 | C | C              | C | C-C              |
| <b>Elektrėnai Reservoir (n = 8)</b> |                       |                   |   |                |   |                  |
| 64                                  | EM3                   | D3                | D | F              | F | D3-F             |
| 65                                  | EM4                   | D                 | D | C              | C | D-C              |
| 66                                  | EM5                   | A                 | A | B              | B | A-B              |
| 67                                  | EM12                  | A                 | A | A              | A | A-A              |
| 68                                  | EM16                  | A                 | A | A              | A | A-A              |
| 69                                  | EM17                  | D                 | D | C              | C | D-C              |
| 70                                  | EM18                  | A                 | A | B              | B | A-B              |
| 71                                  | EM19                  | A                 | A | B              | B | A-B              |
| <b>GenBank (n = 7)</b>              |                       |                   |   |                |   |                  |
| 72                                  | AP005995<br>(China)   | New1 <sup>b</sup> | - | C              | C | New1-C           |
| 73                                  | MZ461595<br>(China)   | New1 <sup>b</sup> | - | C              | C | New1-C           |
| 74                                  | CM020933<br>(France)  | D                 | D | F              | F | D-F              |
| 75                                  | MT410943<br>(Denmark) | D                 | D | F              | F | D-F              |
| 76                                  | KM410088<br>(Hungary) | New2 <sup>c</sup> | - | M              | M | New2-M           |
| 77                                  | LC495488<br>(Denmark) | D                 | D | F <sup>d</sup> | F | D-F <sup>d</sup> |
| 78                                  | AP018422<br>(Denmark) | D                 | D | F <sup>d</sup> | F | D-F <sup>d</sup> |

<sup>a</sup> without 1 bp deletion this could be ascribed as haplotype B of D-loop, <sup>b</sup> new *ATP6* region haplotype detected in China, <sup>c</sup> new *ATP6* region haplotype detected in samples containing D-loop haplotype M, <sup>d</sup> new D-loop haplotype from haplogroup F possessing 1 bp deletion.

**Supplementary Table S3.** Comparison of overall mtDNA *ATP6* and D-loop region haplotypes within studied macrogeographic area. Black, red and green letters represent unique haplotypes, i.e. found only in one of the studied countries, haplotypes detected in all studied countries and haplotypes detected only in Latvia and Lithuania, respectively.

| Haplotypes                        |                                                                                                                                                  |
|-----------------------------------|--------------------------------------------------------------------------------------------------------------------------------------------------|
| <i>ATP6</i> region                |                                                                                                                                                  |
| Latvia (n = 40)                   | A (22), A2 (1), B (1), B1 (1), C (4), C1 (1), D (9), D2 (1)                                                                                      |
| Lithuania (n = 108)               | A (56), A1 (1), A3 (1), B (4), C (24), C2 (1), D (19), D3 (2)                                                                                    |
| Belarus (n = 37)                  | A (5), B (19), C (13)                                                                                                                            |
| Ukraine (n = 8)                   | A (1), B (3), C (3), D1 (1)                                                                                                                      |
| D-loop region                     |                                                                                                                                                  |
| Latvia (n = 178 <sup>a</sup> )    | A (11), B (73), B4 (5), B8, B9 (2), B10, B11, B12, B13, C (33), C6, C7, C8 (2), D (6), F (21), F4 (4), F7, F9, H1, J (5), L1, L2, L5 (2), L7, L9 |
| Lithuania (n = 267 <sup>a</sup> ) | A (37), A2, A6, A8 (2), B (64), B4 (3), B5, B6 (5), B7, B8, C (53), C5, C10, D (4), D1, E (2), E1, F (75), F8 (2), F10, H (5), J (2), J3, L4, L6 |
| Belarus (n = 44)                  | A (5), C (35), C1, C4, F, J                                                                                                                      |

<sup>a</sup> some haplotypes are heteroplasmic length variants (marked L).
