# Supplementary material for: Trends of Eurasian Perch (Perca fluviatilis) mtDNA ATP6 Region Genetic Diversity within the Hydro-Systems of the Eastern Part of the Baltic Sea in the Anthropocene
Source: Animals (Basel). 2023 Sep 29;13(19):3057. doi: 10.3390/ani13193057 (PMC10571732; doi:10.3390/ani13193057)
Supplement: Supplementary file 1 [file animals-13-03057-s001.zip › animals-2600043-Suplementary Material_Document S2.xls]

## Sheet: Suplementary Doc S1
	Codons of studied ATP6 region:
		ATP6 Part
	0	1	2	3	4	5	6	7	8	9	10	11	12	13	14	15	16	17	18	19	20
	__T	ACG	CCC	TCT	GCT	CGG	TGA	CTA	AAC	AAC	CGC	TTC	CTA	GCC	CTA	CAA	GGG	TGA	TTC	ATC	AAC
		T	P	S	A	R	W	L	N	N	R	F	L	A	L	Q	G	W	F	I	N
		21	22	23	24	25	26	27	28	29	30	31	32	33	34	35	36	37	38	39	40
		CGC	TTT	ACC	CAA	CAA	CTT	CTC	CTC	CCC	TTA	AGC	TTA	GGG	GGC	CAT	AAA	TGA	GCC	GCC	CTC
		R	F	T	Q	Q	L	L	L	P	L	S	L	G	G	H	K	W	A	A	L
		41	42	43	44	45	46	47	48	49	50	51	52	53	54	55	56	57	58	59	60
		CTA	ACT	TCC	TTA	ATA	ATT	TTT	TTA	ATT	ACC	ATT	AAT	ATG	TTA	GGC	CTC	CTT	CCT	TAT	ACT
		L	T	S	L	M	I	F	L	I	T	I	N	M	L	G	L	L	P	Y	T
		61	62	63	64	65	66	67	68	69	70	71	72	73	74	75	76	77	78	79	80
		TTT	ACC	CCT	ACT	ACT	CAA	CTA	TCC	CTT	AAT	TTA	GGA	CTT	GCA	GTT	CCA	CTC	TGA	TTG	GCA
		F	T	P	T	T	Q	L	S	L	N	L	G	L	A	V	P	L	W	L	A
		81	82	83	84	85	86	87	88	89	90	91	92	93	94	95	96	97	98	99	100
		ACA	GTC	CTT	ATT	GGA	ATA	CGA	AAT	CAG	CCA	ACA	CAT	GCA	CTC	GGA	CAT	CTT	CTT	CCC	GAA
		T	V	L	I	G	M	R	N	Q	P	T	H	A	L	G	H	L	L	P	E
		101	102	103	104	105	106	107	108	109	110	111	112	113	114	115	116	117	118	119	120
		GGA	ACC	CCC	GGT	CCT	CTA	ATC	CCC	GTC	CTC	ATT	ATT	ATC	GAA	ACA	ATT	AGC	CTG	TTT	ATC
		G	T	P	G	P	L	I	P	V	L	I	I	I	E	T	I	S	L	F	I
		121	122	123	124	125	126	127	128	129	130	131	132	133	134	135	136	137	138	139	140
		CGC	CCT	CTC	GCC	TTG	GGA	GTC	CGA	CTT	ACA	GCT	AAT	CTC	ACA	GCA	GGC	CAT	CTC	TTA	ATT
		R	P	L	A	L	G	V	R	L	T	A	N	L	T	A	G	H	L	L	I
		141	142	143	144	145	146	147	148	149	150	151	152	153	154	155	156	157	158	159	160
		CAA	CTT	ATT	GCC	ACT	GCC	GCC	TTT	GTA	CTT	CTA	CCT	TTA	ATA	CCA	GTC	GTA	GCA	ATC	TTA
		Q	L	I	A	T	A	A	F	V	L	L	P	L	M	P	V	V	A	I	L
		161	162	163	164	165	166	167	168	169	170	171	172	173	174	175	176	177	178	179	180
		ACT	TCC	ACA	GTC	CTC	GTT	CTC	CTC	ACC	CTA	TTA	GAA	GTT	GCC	GTA	GCT	ATA	ATC	CAA	GCT
		T	S	T	V	L	V	L	L	T	L	L	E	V	A	V	A	M	I	Q	A
		181	182	183	184	185	186	187	188	189	190	191	192	193	194	195
		TAC	GTA	TTT	GTT	CTT	CTC	TTG	TCC	CTC	TAT	CTA	CAA	GAA	AAC	GTC
		Y	V	F	V	L	L	L	S	L	Y	L	Q	E	N	V
		cox3 Part
	0	196	197	198	199	200	201	202	203	204	205	206	207	208
	TA	ATG	GCC	CAC	CAA	GCA	CAC	GCA	TAC	CAC	ATA	GTC	GAC	CCC
		M	A	H	Q	A	H	A	Y	H	M	V	D	P
